# Supplementary material
Source: PubMed Central journal article supplement (PMC9599249)
Supplement: jvi.01396-22-s0001.pdf [file jvi.01396-22-s0001.pdf]

Supporting Information for

**“Lyssavirus P protein isoforms diverge significantly in subcellular interactions underlying mechanisms of interferon antagonism”**

Aaron M. Brice, Ashley M. Rozario, Stephen M. Rawlinson, Cassandra T. David, Linda Wiltzer-Bach,  
David A. Jans, Naoto Ito, Toby D.M. Bell, Gregory W. Moseley

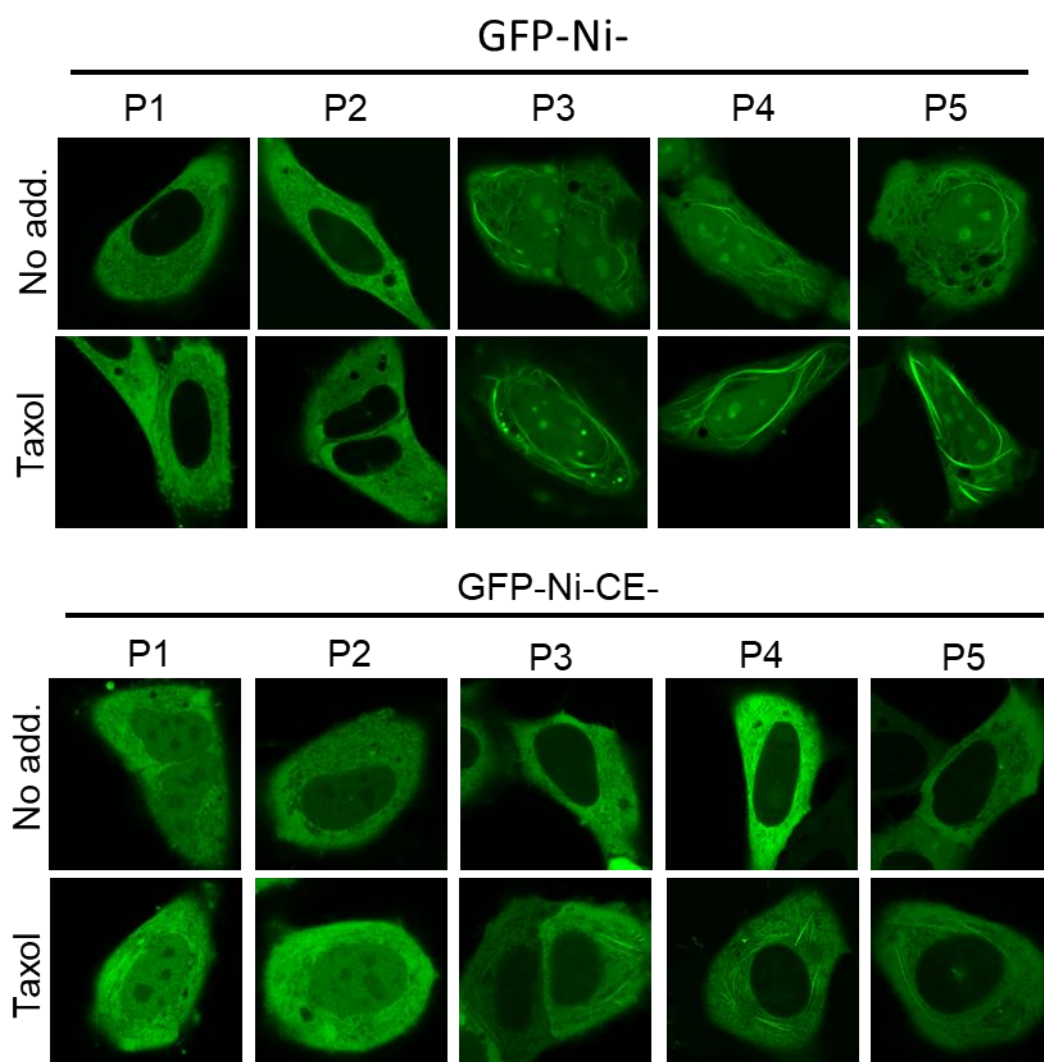

**Figure S1.** Live cell CLSM images of HeLa cells expressing the indicated GFP-fused P protein isoforms, of Nishigahara (upper panel) and Ni-CE (lower panel). Images are representative of cells from  $\geq 5$  fields of view.

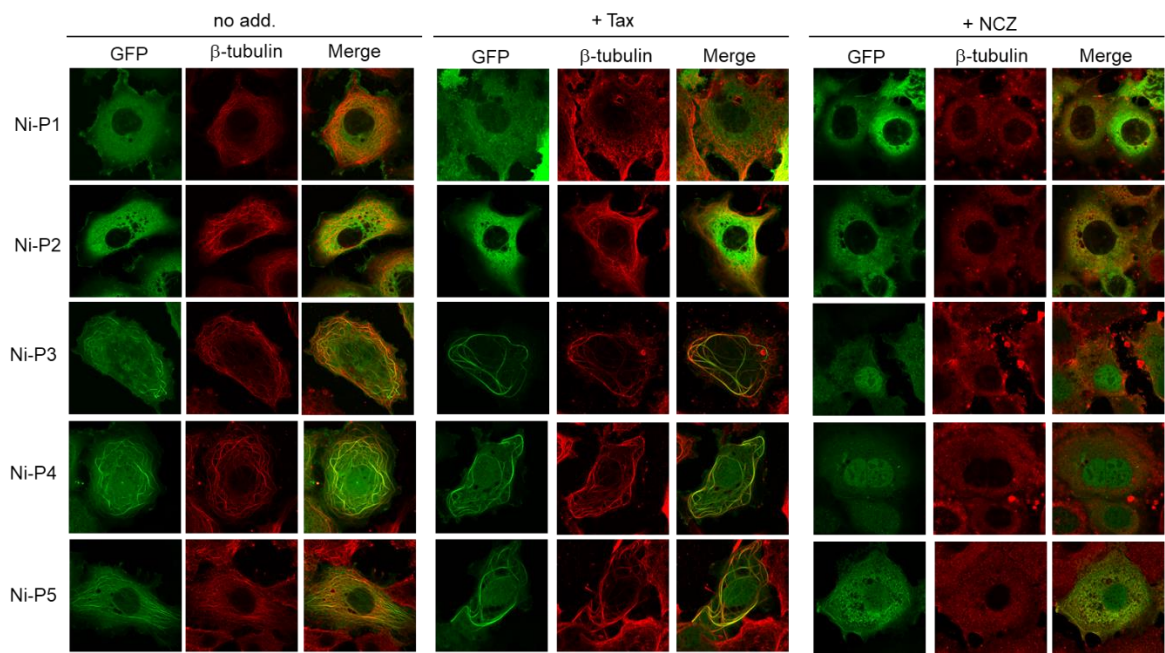

**Figure S2.** CLSM images of COS-7 cells expressing the indicated GFP-fused Ni-P isoforms. Cells were fixed and immunostained for  $\beta$ -tubulin following treatment without (left panels) or with Taxol (center panels) or Nocodazole (right panels). Images are representative of cells from  $\geq 4$  fields of view.

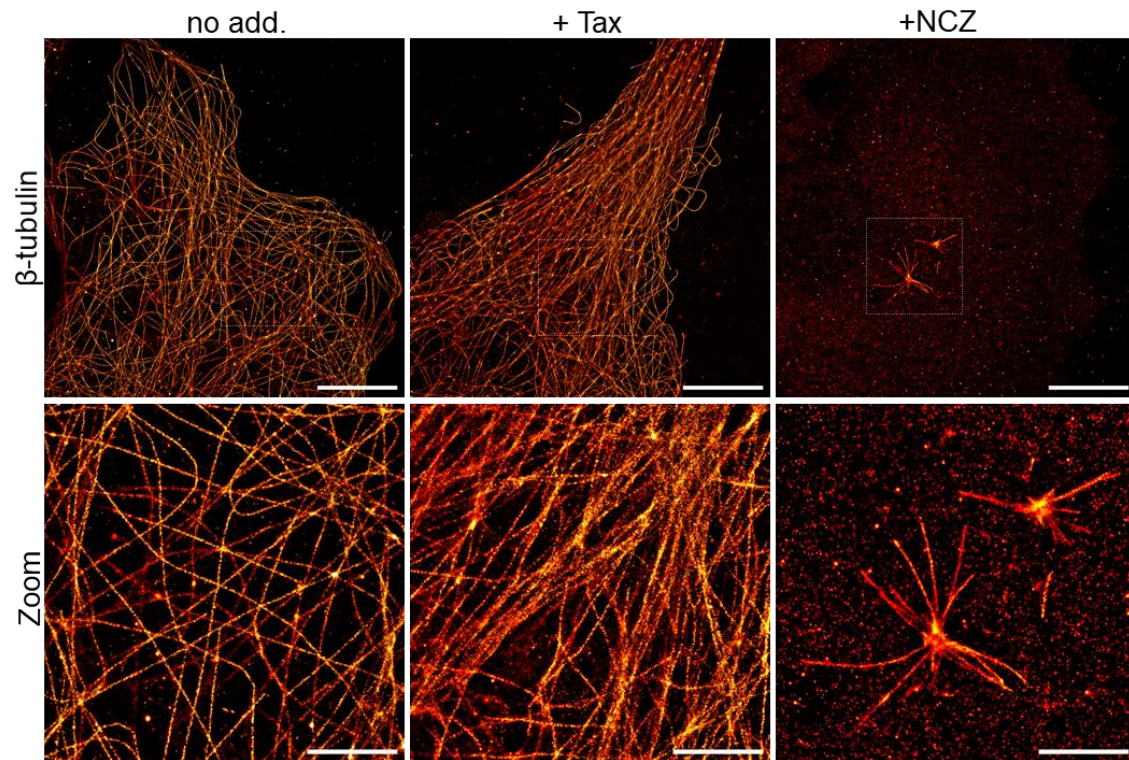

**Figure S3.** Super-resolution imaging of immunolabelled MTs in fixed COS-7 cells treated with Taxol or Nocodazole. dSTORM images indicate expected stimulation of microtubule filament assembly by Taxol and disassembly by Nocodazole (resulting in loss of networks except for MT-organizing centres). Scale bars = 10  $\mu\text{m}$  (top) and 3  $\mu\text{m}$  (bottom).

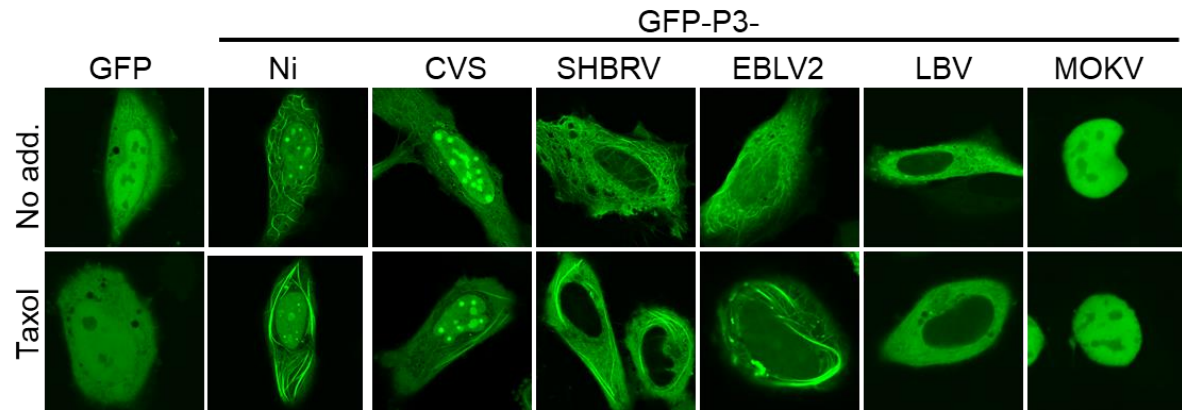

**Figure S4.** Live cell CLSM images of HeLa cells expressing GFP-fused P3 of the indicated lyssaviruses, following treatment with or without Taxol. Images are representative of cells from  $\geq 5$  fields of view (except GFP, 3 fields of view).

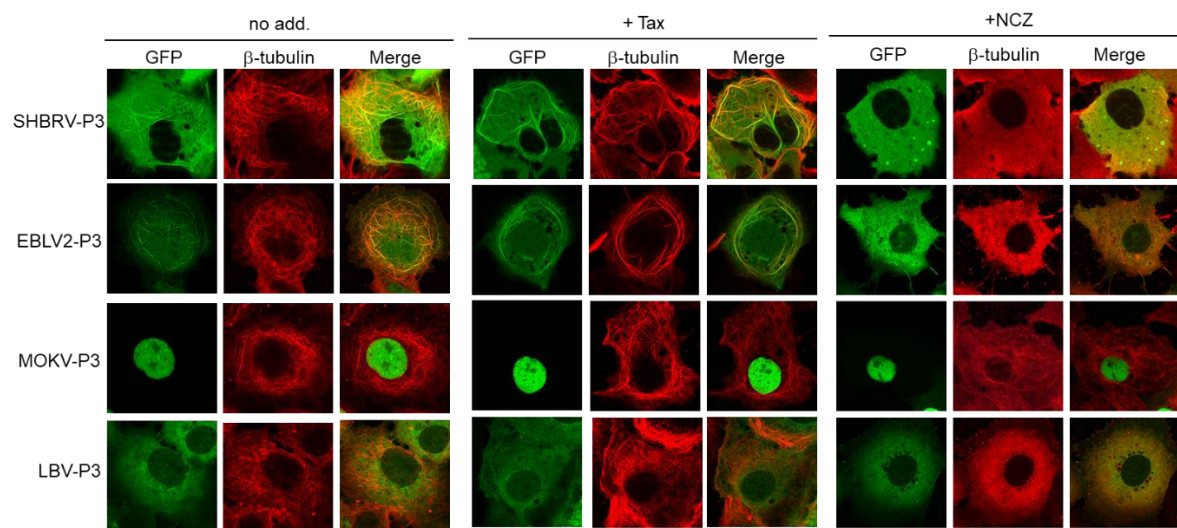

**Figure S5.** CLSM images of COS-7 cells expressing the indicated GFP-fused lyssavirus P3 proteins. Cells were fixed and immunostained for  $\beta$ -tubulin following treatment without (left panel) or with Taxol (centre panel) or Nocodazole (right panel). Images are representative of cells from  $\geq 3$  fields of view.

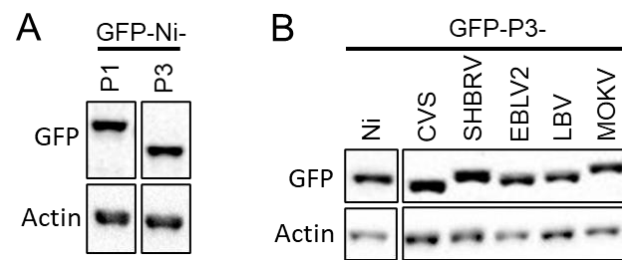

**Figure S6.** Western blot analysis of lysates of COS-7 cells using the indicated antibodies. Irrelevant intervening lanes have been removed.

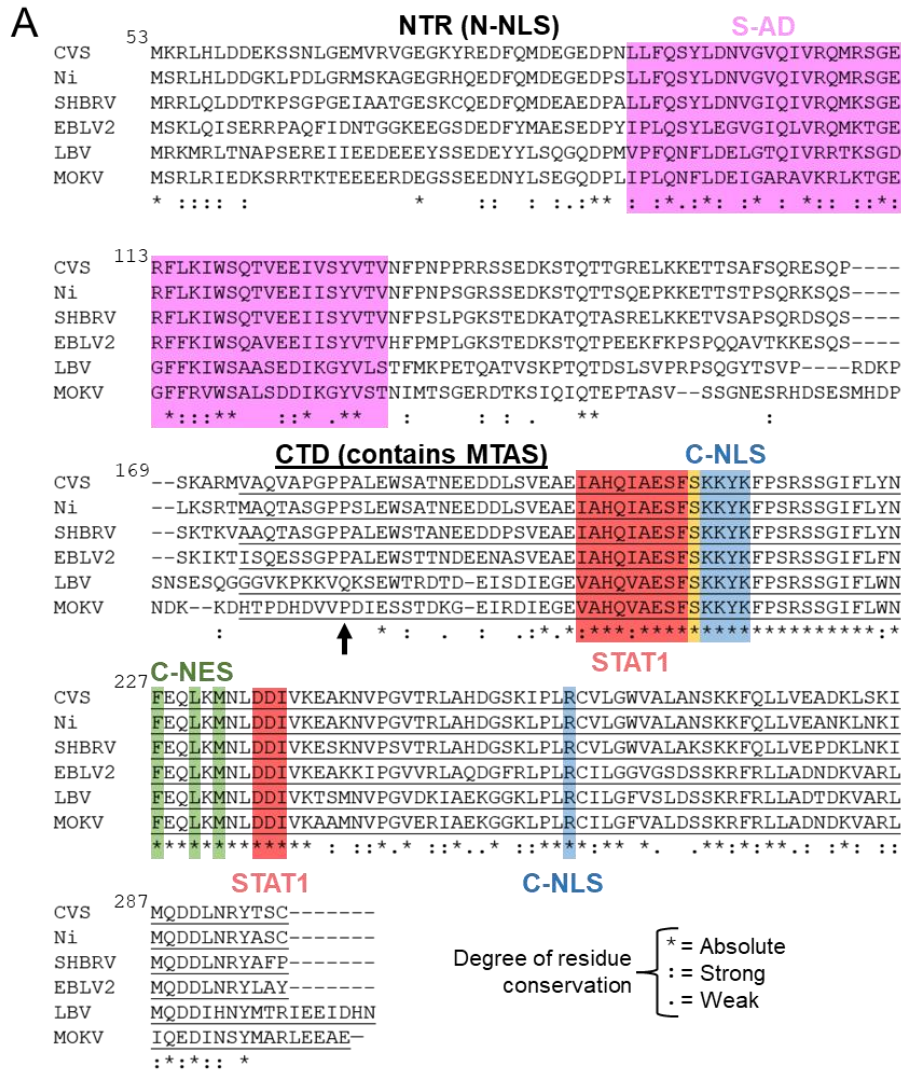

**B**

| Lyssavirus | % P protein similarity |
|------------|------------------------|
| CVS        | 93.6                   |
| Ni         | 100                    |
| SHBRV      | 89.2                   |
| EBLV2      | 81.5                   |
| LBV        | 65.4                   |
| MOKV       | 63.8                   |

**Figure S7. Amino acid alignment of lyssavirus P3.** (A) Protein sequence comparisons of lyssavirus P3 proteins used in this study using Clustal Omega (EMBL-EBI). Regions of P3 protein shown to be important to its functions are indicated, including the N-NLS (localised to the NTR, normal text), S-AD (pink), MTAS (undefined sequence localised within the CTD, underlined text), STAT1-binding (red), S<sub>210</sub> phosphorylation site (yellow), C-NLS (blue) and C-NES (green). Splice site for Ni/MOKV chimeric P3 proteins are labelled by an arrow. Residue numbers correspond to the full length P1 protein of RABV (CVS/Ni). (B) Percent similarity of indicated lyssavirus full-length P proteins (P1) compared to that of Ni.
